# Supplementary material
Source: HighWire-hosted journal article supplement (https://bmjopen.bmj.com/content/12/11/e062895)
Supplement: inline-supplementary-material-1 [file inline-supplementary-material-1.pdf]

## APPENDIX 1

### DETAILED STATISTICAL ANALYSIS PLAN FOR A 30-DAY RANDOMISED, PARALLEL-GROUP, NON-INFERIORITY, CONTROLLED TRIAL INVESTIGATING THE EFFECTS OF DISCONTINUING RENIN-ANGIOTENSIN SYSTEM INHIBITORS IN PATIENTS WITH AND WITHOUT COVID-19: THE RASCOVID-19 TRIAL

Vivian Kliim-Hansen,<sup>1</sup> Lærke Smidt Gasbjerg,<sup>1,2</sup> Anne-Marie Ellegaard,<sup>1</sup> Hans Johan Niklas Lorentsson,<sup>1,3,4</sup> Mads Bank Lynggaard,<sup>1</sup> Christoffer Andersen Hagemann,<sup>1,5</sup> Christian Legart,<sup>1</sup> David Mathiesen,<sup>1</sup> Pradeesh Sivapalan,<sup>6</sup> Jens Ulrik Stæhr Jensen,<sup>6</sup> Tina Vilsbøll,<sup>1,4</sup> Mikkel Bring Christensen,<sup>1,7</sup> Filip Krag Knop<sup>1</sup>

#### Abstract

**Background:** The coronavirus disease 2019 (COVID-19) pandemic caused by the virus severe acute respiratory syndrome coronavirus 2 has spread rapidly and caused damage worldwide. There has been much discussion about how and if treatment with renin-angiotensin system (RAS) inhibiting therapy of COVID-19 patients could possibly affects the course of the disease. This randomised clinical trial will investigate the effect of continued vs. discontinued RAS inhibiting therapy on the course of COVID-19 in hospitalised patients. To ensure transparency and minimisation of bias, we present this article with a statistical analysis plan, to be published before the last participant is enrolled.

**Methods:** RASCOVID-19 is a 30-day randomised, parallel-group, non-inferiority clinical trial with an embedded mechanistic sub study. The population consist of two arms (one hospitalized with COVID-19 and one not hospitalized and COVID-19 negative), in which participants will be randomly assigned in a 1:1 ratio to either discontinue or continue their RAS-inhibiting therapy in addition to standard care. The intervention is not blinded to site investigators, clinical staff at trial sites or participants. Trial statisticians and investigators responsible for the interim analysis and outcome assessment will be blinded to the group allocation. The primary endpoint is number of days alive and out of hospital within 14 days after recruitment. The key-secondary endpoint is the occurrence of worsening of COVID-19.

**Discussion:** This paper describes the statistical analysis plan for the evaluation of primary and secondary endpoints of the RASCOVID-19 trial. Enrolment of patients to the RASCOVID-19 trial is still on-going. The purpose of this article is to prevent selective reporting of outcomes, data-driven analysis and to increase transparency.

**Trial registration:** EudraCT number: 2020-001544-26; ClinicalTrials.gov: NCT04351581, registered 17th of April 2020.

#### Background

The coronavirus disease 2019 (COVID-19) pandemic has spread rapidly and caused damage worldwide. Data from some of the earliest and worst affected countries suggest a major overrepresentation of hypertension and diabetes among COVID-19 related deaths and among patients experiencing severe courses of the disease.[1–3] Importantly, evidence from human [4,5] as well as rodent severe acute respiratory syndrome coronavirus (SARS-CoV) studies [6] suggests that the inhibition of RAS by ACE inhibitors (ACEi) or angiotensin II receptor

blockers (ARB) leads to upregulation of ACE2, and treatment with ARB leads to attenuation of SARS-CoV-induced acute respiratory distress syndrome (ARDS).[7] This is of interest, as the vast majority of deaths from COVID-19 are due to ARDS [3] and ACEi and ARBs have been suggested to alleviate the COVID-19 pulmonary manifestations.[8] In contrast to these notions, concern has been raised that ACE2 upregulation (by RAS inhibitors) will multiply the cellular access points for viral entry and might increase the risk of severe progression of COVID-19.[9] Two recent studies examining the effects of continuation vs. discontinuation of RAS inhibitors in patients admitted to hospital with COVID-19 have not found any difference in outcomes between the groups [10,11] and, therefore, mechanistic prospective randomised trials evaluating the effect of continued vs. discontinued RAS inhibitory therapy on the course of COVID-19 are needed.[12–15]

The International Conference on Harmonization of Good Clinical Practice [16] and leading experts [17] recommend that randomised clinical trials should be analysed according to predefined outcomes and a predefined statistical analysis plan. To prevent outcome reporting bias and data driven analysis and to increase transparency, this article will describe the statistical analysis plan for the RASCOVID-19 trial while enrolment of patients and collection of data is still on-going and before the database is accessed for trial end results.

## Methods and analysis

### Trial overview

RASCOVID-19 is a 30-day, multicentre, randomised, parallel-group, non-inferiority clinical trial, investigating the effect of continued vs. discontinued RAS-inhibiting therapy on the course of COVID-19 in hospitalised patients (figure 1, group A and B). The participants will be randomly assigned in a 1:1 ratio to either discontinue or continue their RAS-inhibiting therapy in addition to standard care for the trial period of 30 days (figure 2).

In addition another group of participants not currently infected with SARS-CoV or in hospital will undergo the same intervention for comparison (figure 1, group C and D).

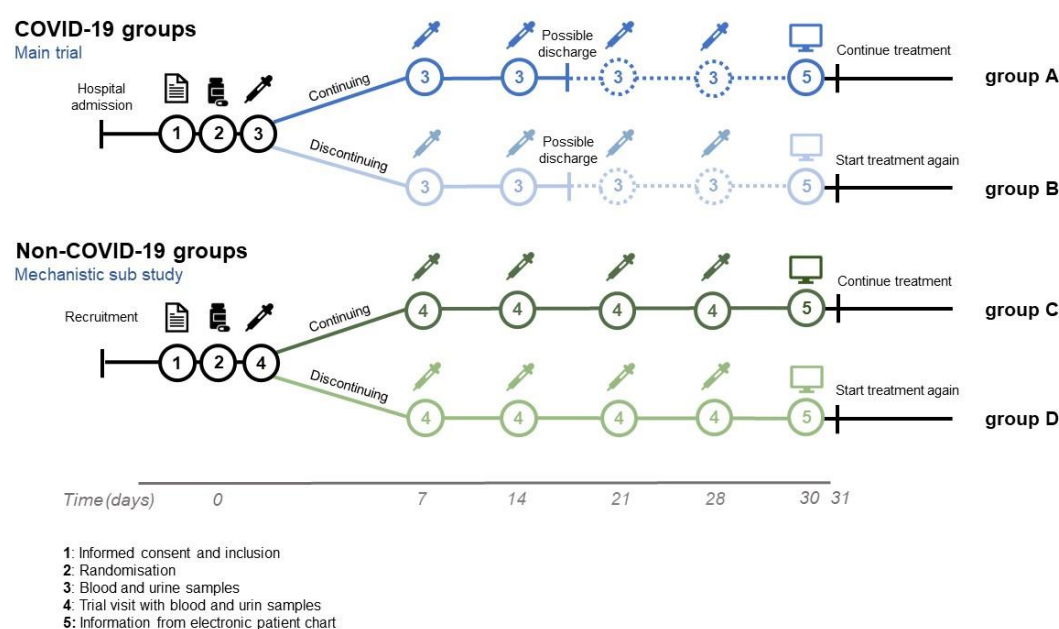

Figure 1: RASCOVID-19 Trial design

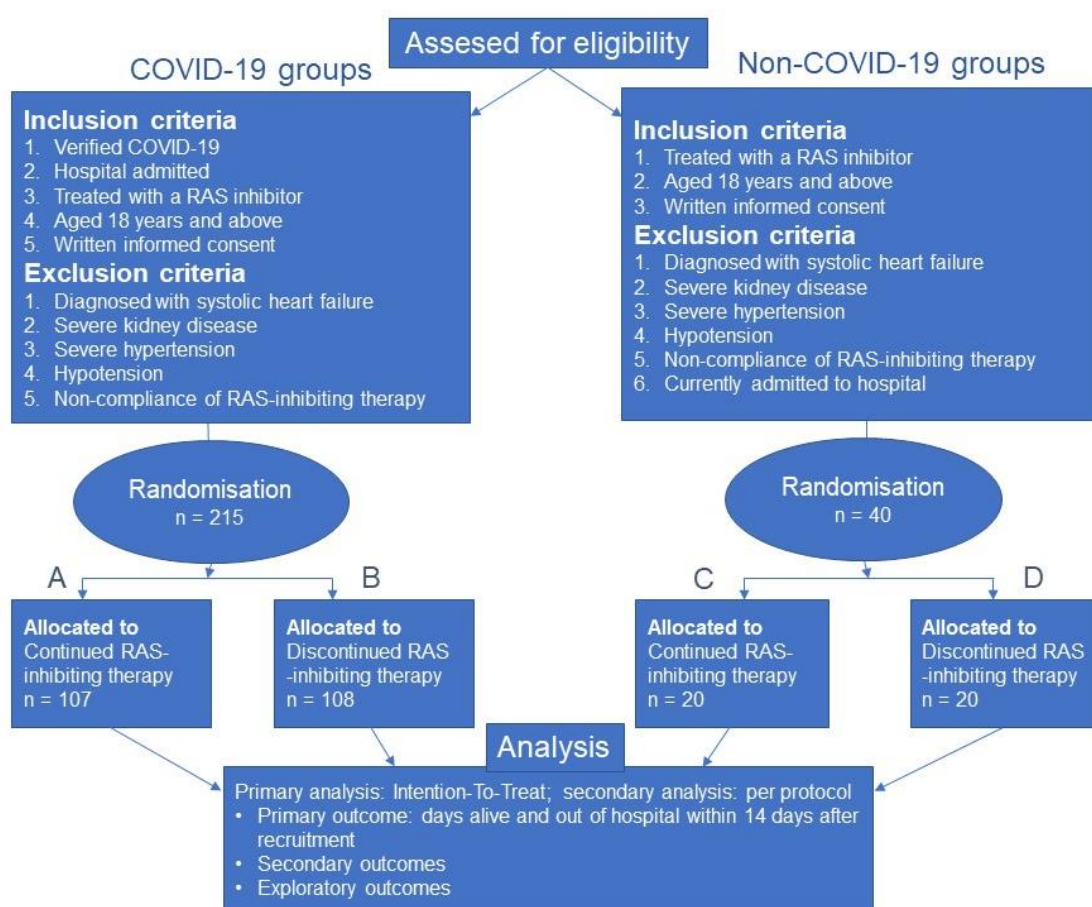

Figure 2: RASCOD-19 Flowchart. COVID-19: coronavirus disease 2019; RAS: renin–angiotensin system

The site investigators, clinical staff at trial sites or participants will not be blinded to the intervention. Trial statisticians and investigators responsible for the interim analysis and outcome assessment will be blinded to the group allocation.

The participants are enrolled in the trial only after obtaining written informed consent.

The trial will be conducted in accordance with the Declaration of Helsinki and is registered at ClinicalTrials.gov (NCT04351581) and EudraCT (2020-001544-26). Before enrolment, the trial was approved by the Scientific-Ethical Committee of the Capital Region of Denmark (identification no. H-20026484), the Danish Medicines Agency (identification no. 2020040883) and by the Danish Data Protection Agency (P-2020-366) and comply with the international General Data Protection Regulation.

Further details can be seen in the protocol. This statistical analysis plan is published while data collection from the RASCOD-19 trial is ongoing. The data analysis of the main publication will follow this plan. The statistical analysis plan has been approved by all authors.

Table 1: RASCOVID-19 Standard Protocol Items: Recommendations for Interventional Trials (SPIRIT) figure. For a more detailed version, see Appendix 2.

-t<sub>1</sub>: 0–48 hours before allocation

The primary outcome of the RASCOVID-19 trial is days alive and out of hospital within 14 days after recruitment. For group A and group B, using a 1-sided alpha of 0.025 and a power (1-beta) of 0.8 in a group sequential design, 1:1 allocation, with one planned interim analysis at 50% recruited, and with a null hypothesis of 0 days of difference, an SD of 3.8 days in the primary outcome measure, the trial will need to have a sample size of 214 patients to detect a worsening of 1.5 days in the primary outcome. Thus, the non-inferiority limit is 1.5 days.

$$n = (Z2\alpha + Z\beta)2 \times (SD1^2 SD2^2) / MIRE DIF^2$$

where  $\alpha$  is the significance level,  $\beta$  is the risk of accepting a false hypothesis, MIREdif is the estimated minimum relevant difference, SD is an approximated standard deviation (see below) of the primary endpoint, and  $Z\alpha$  and  $Z\beta$  are standardised deviations corresponding to the selected  $\alpha$  and  $\beta$  (see below). In a previous study,[18] serum ACE2 activity levels in healthy individuals was (mean $\pm$ SD) 16.2 $\pm$ 5.4 one unit of fluorescence (UF)/ml and 24.8 $\pm$ 12.4 UF/ml in hypertensive individuals. If we estimate a baseline of 25 UF/ml with a SD of 10 UF/ml and we want to be able to detect a MIREdif in serum ACE2 activity of 9 UF/ml between the two COVID-19 negative groups (i.e. continued and discontinued) at trial end; and we set  $\alpha = 5\%$  and power  $(1-\beta)$  to 80% (corresponding to  $Z2\alpha = 1.96$  and  $Z\beta = 0.84$ ), then the number of participants needed in each COVID-19 negative group is 19 ( $n = (1.96 + 0.84)^2 \times (10^2 + 10^2) / 9^2 = 19$ ). The population size has been set to 20 in each group to ensure power in case of drop out.

### **Stratification and design variables**

For group A and B, randomisation will be in blocks of unknown size and the final allocation will be stratified for age (intervals:  $\leq 65$  years or  $> 65$  years), trial site and participation in other COVID-19 randomised clinical trials. For group C and D, the allocation will be stratified for age (intervals:  $\leq 65$  years or  $> 65$  years).

### **Outcomes**

#### **Primary outcome**

The primary endpoint is days alive and out of hospital within 14 days after recruitment (group A vs. group B), on which a patient satisfies categories 0, 1 or 2 on the eight-category ordinal scale (figure 3).[19]

| WHO defined Ordinal Scale for Clinical Improvement |                                                                                                                                          |
|----------------------------------------------------|------------------------------------------------------------------------------------------------------------------------------------------|
| 1.                                                 | Not hospitalised, no clinical or virological evidence of infection                                                                       |
| 2.                                                 | Not hospitalised, no limitations of activities                                                                                           |
| 3.                                                 | Not hospitalised, limitation of activities                                                                                               |
| 4.                                                 | Hospitalised, no oxygen therapy                                                                                                          |
| 5.                                                 | Hospitalised, oxygen by mask or nasal prongs                                                                                             |
| 6.                                                 | Hospitalised, non-invasive ventilation or high-flow oxygen                                                                               |
| 7.                                                 | Hospitalised, intubation and mechanical ventilation                                                                                      |
| 8.                                                 | Hospitalised, ventilation and additional organ support – pressors, rapid response team (RRT), extracorporeal membrane oxygenation (ECMO) |
| 9.                                                 | Death                                                                                                                                    |

Figure 3: WHO defined Ordinal Scale for Clinical Improvement.[19] WHO: World Health Organisation

#### **Secondary outcomes**

The key-secondary endpoint is the occurrence of worsening of COVID-19 (group A vs. group B) as assessed by when a patient satisfies category 6,7 or 8 on the ordinal scale (figure 3) within the trial period.[19]

Other secondary endpoints include:

- Time to occurrence of each of the components of the key-secondary composite endpoint (group A vs. group B)
- Kidney function (as assessed by plasma creatinine and eGFR)
- Duration of index hospitalisation (group A vs. group B)
- 30-day mortality (differences in mortality will be displayed as number of days alive during the intervention period) (group A vs. group B)
- Discharge beyond day 30 (group A vs. group B)
- Number of readmissions after day 30 (group A vs. group B)
- Change in circulating levels of RAS components (ACE, ACE2, aldosterone, angiotensin II and renin), expression of ACE, interferon signatures, T cell exhaustion markers and blood pressure

#### **Measurement of outcome variables**

Data will be collected through access to the participants medical chart as well as through questionnaires, urine and blood samples during the full trial period of 30 days, and at trial visits. Data will be obtained by the site investigators in case report forms stored in the data-managing program of the Capital Region of Denmark. All participants will be assigned a trial number and will on data sheets and tubes only appear with the trial number.

The full name, social security number and trial number will be stored separately. For patients in group A and B, who are discharged before 30 days follow up will be done through electronic patient charts and phone calls.

### Baseline characteristics

The baseline characteristics of the participants will be obtained from the patient, and from the patients' medical chart after randomisation. The baseline characteristics can be seen in Table 2.

|                              | Factor                                                 | Unit                          | Data          |
|------------------------------|--------------------------------------------------------|-------------------------------|---------------|
| Demographic characteristics  |                                                        |                               |               |
|                              | Age                                                    | years                         | mean $\pm$ SD |
|                              | Sex (Male / female)                                    | %                             | n/total       |
|                              | White race                                             | %                             | n/total       |
|                              | Current smoker                                         | %                             | n/total       |
|                              | Ex-smoker                                              | %                             | n/total       |
|                              | Non-smoker                                             | %                             | n/total       |
|                              | Smoking history, pack-years history                    | years                         | mean, 95% CI  |
|                              | Alcohol use                                            | units per week                | mean, 95% CI  |
|                              | Manifest atherosclerotic cardiovascular disease        | %                             | n/total       |
|                              | Active non-melanoma skin cancer                        | %                             | n/total       |
|                              | Dementia                                               | %                             | n/total       |
|                              | Diabetes type 2                                        | %                             | n/total       |
|                              | Diabetes type 1                                        | %                             | n/total       |
|                              | If diabetes, baseline or recent HbA1c, mmol/mol        | %                             | median, IQR   |
|                              | Chronic obstructive pulmonary disease                  | %                             | n/total       |
|                              | Asthma                                                 | %                             | n/total       |
|                              | If pulmonary disease, baseline or recent FEV1/FVC      | % of expected value           | median, IQR   |
|                              | Severe chronic kidney disease, stage 4-5               | %                             | n/total       |
|                              | Hypertension                                           | %                             | n/total       |
|                              | If hypertension, duration of hypertension              | years                         | median, IQR   |
|                              | Type of RAS targeting treatment (ACE inhibitor or ARB) | %                             | n/total       |
|                              | Duration of RAS targeting treatment                    | months                        | median, IQR   |
|                              | Medical treatments other than RAS targeting treatment  | number of drugs; drug name(s) | n/total       |
| Paraclinical characteristics |                                                        |                               |               |
|                              | Baseline body mass index                               | kg/m <sup>2</sup>             | mean, 95% CI  |
|                              | Baseline systolic blood pressure                       | mm Hg                         | median, IQR   |
|                              | Baseline diastolic blood pressure, mm Hg (median, IQR) | mm Hg                         | median, IQR   |
|                              | Baseline heart rate                                    | beats/minute                  | median, IQR   |
|                              | Use of oxygen therapy                                  | %                             | median, IQR   |
|                              | Respiratory rate                                       | breaths per minute            | median, IQR   |
|                              | Baseline oxygen saturation, %                          | %                             | median, IQR   |
|                              | Baseline temperature                                   | °C                            | median, IQR   |
|                              | Baseline leukocyte count                               | $\times 10^9$ cells/L         | mean, 95% CI  |
|                              | Baseline CRP                                           | mg/L                          | median, IQR   |
|                              | Baseline D-dimer                                       | mg/L                          | median, IQR   |
|                              | Baseline ferritin                                      | $\mu$ g/L                     | median, IQR   |
|                              | Baseline troponin T                                    | ng/L                          | median, IQR   |

|  |                                    |        |             |
|--|------------------------------------|--------|-------------|
|  | Baseline eGFR                      | mL/min | median, IQR |
|  | Baseline arterial blood gas values |        |             |
|  | pCO <sub>2</sub>                   | kPa    | median, IQR |
|  | pO <sub>2</sub>                    | kPa    | median, IQR |
|  | HCO <sub>3</sub>                   | mmol/L | median, IQR |
|  | pH                                 |        | median, IQR |
|  | Chest X-ray infiltrate             | %      | n/total     |

Table 2: RASCOVID-19 Baseline characteristics

*General analysis principles*

The analysis principles are as follows:

- All analyses will be conducted on an intention-to-treat basis. All randomised participants will be analysed in the group to which they were assigned
- Statistical hypothesis tests will be evaluated at a nominal two-sided 5% level of significance
- Intervention effect estimates (i.e. difference in means, hazard ratio) and their 95% confidence interval (CI) will be reported for all outcomes
- P values will not be adjusted for multiple comparisons
- P values will be reported to two decimal places unless the P value is less than 0.001, in which case it will be reported as '< 0.001'
- Analyses will be conducted primarily using SAS version 9.4

*Level of significance*

All the statistical tests will be performed using a 5% significance level, and we will report the 95% confidence interval. No adjustment for multiplicity is needed for the primary hypothesis.

*Missing data*

It is not anticipated that there will be a lot of missing data. However, in the unlikely event that there is more than 10% of data values missing, missing values will be imputed, if possible, using a suitable imputation method.

*Statistical analysis*

Table of statistical analysis:

|  | Factor                                                          | Unit   | Data         | Analysis                              |
|--|-----------------------------------------------------------------|--------|--------------|---------------------------------------|
|  | Primary Outcome                                                 |        |              |                                       |
|  | Days alive and out of hospital within 14 days after recruitment | days   | mean, 95% CI | t-test or a non-parametric test       |
|  | Secondary outcomes                                              |        |              |                                       |
|  | Intubation and mechanical ventilation                           | %      | n/total      | Chi-square test or fishers exact test |
|  | Ventilation and additional organ support                        | %      | n/total      | Chi-square test or fishers exact test |
|  | Death                                                           | %      | n/total      | Chi-square test or fishers exact test |
|  | Referral to treatment in an intensive care unit                 | %      | n/total      | Chi-square test or fishers exact test |
|  | Kidney function                                                 | mL/min | median, IQR  | t-test or Mann-Whitney test           |

|  |                                                     |      |             |                                                                  |
|--|-----------------------------------------------------|------|-------------|------------------------------------------------------------------|
|  | Duration of index hospitalisation                   | days | median, IQR | t-test or Mann-Whitney test                                      |
|  | 30-day mortality                                    | days | median, IQR | Kaplan-Meier plots method in combination with the log-rank test. |
|  | Discharge beyond day 30                             | %    | n/total     | Chi-square test or fishers exact test                            |
|  | Number of readmissions after day 30 days            | n    | n/total     | Chi-square test or fishers exact test                            |
|  | Number of days alive during the intervention period | days | median, IQR | t-test or Mann-Whitney test                                      |

Table 3: RASCOVID-19 Statistical analysis. CI: confidence interval; IQR: interquartile range; n: number

### Statistical analysis of the primary outcome

The primary outcome is the number of days alive and out of hospital within 14 days after recruitment in the continuing group compared to the discontinuing group (group A vs. group B). Data for the primary outcome analysis will be presented as mean with 95% CI and corresponding t-test or a non-parametric test if the data is not normally distributed (table 3).

In general, data will be processed and presented with the use of standard descriptive statistics. Normally distributed data will be compared using standard parametric statistical methods. Repeated measurement analysis of variance will be used for statistical analysis of repeated measurements in the same subject. Data that are not normally distributed will be compared using the Mann-Whitney U-test or the Wilcoxon test for data pairs. 95% confidence intervals will be calculated. Two-sided 5% significance levels will be used to identify statistically significant results. The primary endpoint will be analysed according to the intention-to-treat analysis set with appropriate support provided by the per-protocol analysis set. In the intention-to-treat analysis, every randomised subject will be analysed according to their original assignment. Per-protocol analysis denotes the comparison of treatment groups including only those patients who completed the treatment originally allocated. Data will be presented both with and without adjustment for participation in other clinical trials and for drug class (ACEi or ARBs). Excluded participants and missing, unused or false data will be described.

### Statistical analyses of secondary and explorative outcomes

Analyses of the composite key secondary as well as other secondary endpoints outlined in the protocol from baseline to follow-up will be included when assessing the clinical outcome. Appropriate statistical tests will be used for each dataset (table 3). Assessment of secondary endpoints will be performed by intention-to-treat (ITT) analysis according to the number of participants adhering to the allocated intervention.

### Interim analysis

A Data and Safety Monitoring Board (DSMB) will be appointed and act according to a charter agreed by the investigators and approved by the sponsor. When half of the total population has been randomised (i.e. 108 participants), a blinded interim analysis based on the ITT population will be performed to evaluate the continuation of the trial. The sample size will be evaluated and if needed, a higher number of participants will be applied for to relevant authorities. As main statistical measures, an O'Brien-Fleming plot of the primary endpoint and mortality (calculating Z-scores) will be performed. Moreover, the DSMB will assess the primary outcome measure and can, based on admission duration data (days), recommend to adjust the number of days alive and out of hospital to 21 instead of 14 days. In this case, there is no new sample size calculation since the standard deviation of the primary outcome does not change substantially, which we do not anticipate. The

interim analysis will be performed and presented by a sub-investigator not otherwise involved in the data collection or analyses. The data will be presented in a blinded fashion.

### *Outline of figures and tables in the primary manuscript*

The manuscript will include a consolidated standard of reporting of randomised trials (CONSORT) flow chart, a Kaplan-Meier plot to describe the rate of death by treatment groups (for group A and B), a table with baseline characteristics of the ITT population and a table including the primary and secondary outcomes according to the two allocation and pairwise comparisons.

### *Blinding of statisticians*

The interim and final analyses will be performed by MD PhD Pradeesh Sivapalan and Professor Jens-Ulrik Jensen (who are not investigators of this trial) from Section of Respiratory Medicine, Department of Medicine, Copenhagen University Hospital - Herlev and Gentofte, Copenhagen, Denmark.

### **Trial status**

Currently 78 participants have been enrolled in the trial; 40 in group A and B, and 38 in group C and D. Recruitment is expected to finish 1<sup>st</sup> July 2022.

### **Abbreviations**

ACE: angiotensin-converting enzyme

ACE2: angiotensin-converting enzyme 2

ARB: angiotensin II receptor blocker

CI: confidence interval

CONSORT: consolidated standards of reporting of randomised trials

COVID-19: coronavirus disease 2019

CRP: c-reactive protein

DSMB: data safety monitoring board

eGFR: estimated glomerular filtration rate

FEV1: forced expired volume

FiO<sub>2</sub>: fraction of inspired oxygen

FVC: forced vital capacity

HbA1c: haemoglobin A1c

HCO<sub>3</sub>: bicarbonate

IQR: interquartile range

ITT: intention to treat

pCO<sub>2</sub>: partial pressure of carbon dioxide

pO<sub>2</sub>: partial pressure of oxygen

RAS: renin–angiotensin system

SARS-CoV: severe acute respiratory syndrome coronavirus

SD: standard deviation

UF: one unit of fluorescence

### Authors affiliations

<sup>1</sup>Center for Clinical Metabolic Research, Department of Medicine, Copenhagen University Hospital - Herlev and Gentofte, Copenhagen, Denmark

<sup>2</sup>Department of Biomedical Sciences, Faculty of Health and Medical Sciences, University of Copenhagen, Copenhagen, Denmark

<sup>3</sup>Section of Infectious Medicine, Department of Medicine, Copenhagen University Hospital - Herlev and Gentofte, Copenhagen, Denmark

<sup>4</sup>Steno Diabetes Center Copenhagen, Hellerup, Denmark

<sup>5</sup>Gubra ApS, Hørsholm, Denmark

<sup>6</sup>Section of Respiratory Medicine, Department of Medicine, Copenhagen University Hospital - Herlev and Gentofte, Copenhagen, Denmark

<sup>7</sup>Department of Clinical Pharmacology, Copenhagen University Hospital - Bispebjerg and Frederiksberg, Copenhagen, Denmark

### Authors contributions

LSG, CAH, MBL, TV, VKH, AME, MBC, JUSJ and FKK designed the trial and wrote the trial protocol. VKH and HJNL are collecting the data. VKH, will perform the data analysis and write the primary publication. All authors have critically edited the manuscript and approved the final version.

### Funding

This work was supported by an unrestricted grant from the Novo Nordisk Foundation (grant number NNF20SA0062873) to Center for Clinical Metabolic Research, Copenhagen University Hospital – Herlev and Gentofte, Copenhagen, Denmark. The investigators will not receive any personal financial reimbursement from conducting the trial. The funding body has no role in the design of the trial and collection, analysis or interpretation of data or in writing the manuscripts.

### Conflict of interest

The authors declare that they have no competing interests in relation to this trial.

## References

- 1 Giulia F. Report sulle caratteristiche dei pazienti deceduti positivi a COVID-19 in Italia Il presente report è basato sui dati aggiornati al 17 Marzo 2020. Istituto Superiore Di Sanità 2020.
- 2 Guan W-J, Ni Z-Y, Hu Y, *et al.* Clinical Characteristics of Coronavirus Disease 2019 in China. *N Engl J Med* 2020;**382**:1708–20. doi:10.1056/NEJMoa2002032
- 3 Zhou F, Yu T, Du R, *et al.* Clinical course and risk factors for mortality of adult inpatients with COVID-19 in Wuhan, China: a retrospective cohort study. *Lancet Lond Engl* 2020;**395**:1054–62. doi:10.1016/S0140-6736(20)30566-3
- 4 Furuhashi M, Moniwa N, Mita T, *et al.* Urinary angiotensin-converting enzyme 2 in hypertensive patients may be increased by olmesartan, an angiotensin II receptor blocker. *Am J Hypertens* 2015;**28**:15–21. doi:10.1093/ajh/hpu086
- 5 Vuille-dit-Bille RN, Camargo SM, Emmenegger L, *et al.* Human intestine luminal ACE2 and amino acid transporter expression increased by ACE-inhibitors. *Amino Acids* 2015;**47**:693–705. doi:10.1007/s00726-014-1889-6
- 6 Ocaranza MP, Godoy I, Jalil JE, *et al.* Enalapril attenuates downregulation of Angiotensin-converting enzyme 2 in the late phase of ventricular dysfunction in myocardial infarcted rat. *Hypertens Dallas Tex* 1979 2006;**48**:572–8. doi:10.1161/01.HYP.0000237862.94083.45
- 7 Kuba K, Imai Y, Rao S, *et al.* A crucial role of angiotensin converting enzyme 2 (ACE2) in SARS coronavirus-induced lung injury. *Nat Med* 2005;**11**:875–9. doi:10.1038/nm1267
- 8 Sun ML, Yang JM, Sun YP, *et al.* [Inhibitors of RAS Might Be a Good Choice for the Therapy of COVID-19 Pneumonia]. *Zhonghua Jie He He Hu Xi Za Zhi Zhonghua Jiehe He Huxi Zazhi Chin J Tuberc Respir Dis* 2020;**43**:219–22. doi:10.3760/cma.j.issn.1001-0939.2020.03.016
- 9 Fang L, Karakiulakis G, Roth M. Are patients with hypertension and diabetes mellitus at increased risk for COVID-19 infection? *Lancet Respir Med* 2020;**8**:e21. doi:10.1016/S2213-2600(20)30116-8
- 10 Cohen JB, Hanff TC, William P, *et al.* Continuation versus discontinuation of renin–angiotensin system inhibitors in patients admitted to hospital with COVID-19: a prospective, randomised, open-label trial. *Lancet Respir Med* 2021;**9**:275–84. doi:10.1016/S2213-2600(20)30558-0
- 11 Lopes RD, Macedo AVS, de Barros E Silva PGM, *et al.* Effect of Discontinuing vs Continuing Angiotensin-Converting Enzyme Inhibitors and Angiotensin II Receptor Blockers on Days Alive and Out of the Hospital in Patients Admitted With COVID-19. *JAMA* 2021;**325**:254–64. doi:10.1001/jama.2020.25864
- 12 Sparks MA HS *et al.* The Coronavirus Conundrum: ACE2 and Hypertension Edition. *NephJC* 2020.
- 13 Murthy VL, Koupenova M, Shah RV. ACEing COVID-19: A Role for Angiotensin Axis Inhibition in SARS-CoV-2 Infection? *Circ Res* 2020;**126**:1682–4. doi:10.1161/CIRCRESAHA.120.317174
- 14 Bozkurt B, Kovacs R, Harrington B. Joint HFSA/ACC/AHA Statement Addresses Concerns Re: Using RAAS Antagonists in COVID-19. *J Card Fail* 2020;**26**:370. doi:10.1016/j.cardfail.2020.04.013
- 15 Askin L, Tanrıverdi O, Askin HS. The Effect of Coronavirus Disease 2019 on Cardiovascular Diseases. *Arq Bras Cardiol* 2020;**114**:817–22. doi:10.36660/abc.20200273
- 16 ICH GCP - ICH harmonised guideline integrated addendum to ICH E6(R1): Guideline for Good Clinical Practice ICH E6(R2) ICH Consensus Guideline. <https://ichgcp.net/> (accessed 25 Jun 2020).
- 17 Finfer S, Bellomo R. Why publish statistical analysis plans? *Crit Care Resusc J Australas Acad Crit Care Med* 2009;**11**:5–6.

- 18 Úri K, Fagyas M, Mányiné Siket I, *et al.* New perspectives in the renin-angiotensin-aldosterone system (RAAS) IV: circulating ACE2 as a biomarker of systolic dysfunction in human hypertension and heart failure. *PloS One* 2014;**9**:e87845. doi:10.1371/journal.pone.0087845
- 19 COVID-19\_Treatment\_Trial\_Design\_Master\_Protocol\_synopsis\_Final\_18022020.pdf.  
[https://www.who.int/blueprint/priority-diseases/key-action/COVID-19\\_Treatment\\_Trial\\_Design\\_Master\\_Protocol\\_synopsis\\_Final\\_18022020.pdf](https://www.who.int/blueprint/priority-diseases/key-action/COVID-19_Treatment_Trial_Design_Master_Protocol_synopsis_Final_18022020.pdf) (accessed 17 Aug 2020).
