# Supplementary material
Source: HighWire-hosted journal article supplement (https://bmjopen.bmj.com/content/12/11/e062895)
Supplement: inline-supplementary-material-2 [file inline-supplementary-material-2.pdf]

## APPENDIX 2

### Schedule of enrolment, interventions and assessments, Group A + B

|                                     | STUDY PERIOD    |            |                 |                |                |                |                |                |                |
|-------------------------------------|-----------------|------------|-----------------|----------------|----------------|----------------|----------------|----------------|----------------|
|                                     | Enrolment       | Allocation | Post-allocation |                |                |                |                |                |                |
| TIMEPOINT                           | -t <sub>1</sub> | 0          | t <sub>1</sub>  | t <sub>2</sub> | t <sub>3</sub> | t <sub>4</sub> | t <sub>5</sub> | t <sub>6</sub> | t <sub>7</sub> |
| <b>ENROLMENT:</b>                   |                 |            |                 |                |                |                |                |                |                |
| Eligibility screen                  | X               |            |                 |                |                |                |                |                |                |
| Informed consent                    | X               |            |                 |                |                |                |                |                |                |
| Questionnaire                       | X               |            |                 |                |                |                |                |                |                |
| Allocation                          |                 | X          |                 |                |                |                |                |                |                |
| <b>INTERVENTIONS:</b>               |                 |            |                 |                |                |                |                |                |                |
| Continued RAS-inhibiting therapy    |                 |            | ↔               |                |                |                |                |                |                |
| Discontinued RAS-inhibiting therapy |                 |            | ↔               |                |                |                |                |                |                |
| <b>ASSESSMENTS:</b>                 |                 |            |                 |                |                |                |                |                |                |
| Basic Health Information            |                 |            | X               |                |                |                |                |                |                |
| Biochemistry Standard               |                 |            | X               | X              |                |                |                |                |                |
| A-gas                               |                 |            | X               | X              |                |                |                |                |                |
| EWS                                 |                 |            | X               | X              |                |                |                |                |                |
| Radiology                           |                 |            | X               |                | X              |                |                |                |                |
| Study Specific bio-samples          |                 |            | X               |                |                | X              |                |                |                |
| Primary endpoint day 14             |                 |            |                 |                |                |                | X              |                |                |
| Primary endpoint day 21             |                 |            |                 |                |                |                |                | X              |                |
| Key Secondary endpoints             |                 |            |                 |                | X              |                |                |                |                |
| Discharge                           |                 |            |                 |                | X              |                |                |                |                |
| 30 days follow-up                   |                 |            |                 |                |                |                |                |                | X              |
| AE                                  |                 |            |                 |                | X              |                |                |                |                |
| Drop out                            |                 |            |                 |                | X              |                |                |                |                |

- t<sub>1</sub> 0-48 hours before allocation
- t<sub>1</sub> first 24 hours after allocation
- t<sub>2</sub> thrice daily during admission
- t<sub>3</sub> all available data during admission
- t<sub>4</sub> weekly during admission
- t<sub>5</sub> day 14
- t<sub>6</sub> day 21
- t<sub>7</sub> day 30

## Schedule of enrolment, interventions and assessments, Group C + D

|                                     | STUDY PERIOD            |            |                       |                       |                       |                       |                       |                       |
|-------------------------------------|-------------------------|------------|-----------------------|-----------------------|-----------------------|-----------------------|-----------------------|-----------------------|
|                                     | Enrolment               | Allocation | Post-allocation       |                       |                       |                       |                       |                       |
| TIMEPOINT                           | - <i>t</i> <sub>1</sub> | 0          | <i>t</i> <sub>1</sub> | <i>t</i> <sub>2</sub> | <i>t</i> <sub>3</sub> | <i>t</i> <sub>4</sub> | <i>t</i> <sub>5</sub> | <i>t</i> <sub>6</sub> |
| <b>ENROLMENT:</b>                   |                         |            |                       |                       |                       |                       |                       |                       |
| Eligibility screen                  | X                       |            |                       |                       |                       |                       |                       |                       |
| Informed consent                    | X                       |            |                       |                       |                       |                       |                       |                       |
| Questionnaire                       | X                       |            |                       |                       |                       |                       |                       |                       |
| Allocation                          |                         | X          |                       |                       |                       |                       |                       |                       |
| <b>INTERVENTIONS:</b>               |                         |            |                       |                       |                       |                       |                       |                       |
| Continued RAS-inhibiting therapy    |                         |            | ↔                     |                       |                       |                       |                       |                       |
| Discontinued RAS-inhibiting therapy |                         |            | ↔                     |                       |                       |                       |                       |                       |
| <b>ASSESSMENTS:</b>                 |                         |            |                       |                       |                       |                       |                       |                       |
| Basic Health Information            |                         |            | X                     |                       |                       |                       |                       |                       |
| Biochemistry Standard               |                         |            | X                     | X                     | X                     | X                     | X                     |                       |
| EWS                                 |                         |            | X                     | X                     | X                     | X                     | X                     |                       |
| Study Specific bio-samples          |                         |            | X                     | X                     | X                     | X                     | X                     |                       |
| Primary endpoint day 14             |                         |            |                       |                       | X                     |                       |                       |                       |
| Primary endpoint day 21             |                         |            |                       |                       |                       | X                     |                       |                       |
| Key Secondary endpoints             |                         |            |                       | X                     | X                     | X                     | X                     | X                     |
| 30 days follow-up                   |                         |            |                       |                       |                       |                       |                       | X                     |
| AE                                  |                         |            |                       | X                     | X                     | X                     | X                     | X                     |
| Drop out                            |                         |            |                       | X                     | X                     | X                     | X                     | X                     |

- t*<sub>1</sub> before allocation  
*t*<sub>1</sub> first study visit, day 0  
*t*<sub>2</sub> second study visit, day 7  
*t*<sub>3</sub> third study visit, day 14  
*t*<sub>4</sub> fourth study visit, day 21  
*t*<sub>5</sub> fifth study visit, day 28  
*t*<sub>6</sub> day 30
