# Supplementary material
Source: HighWire-hosted journal article supplement (https://bmjopen.bmj.com/content/12/11/e062895)
Supplement: inline-supplementary-material-3 [file inline-supplementary-material-3.pdf]

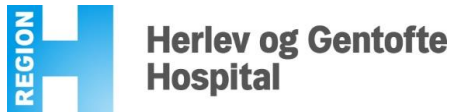

Deltagerinformation angående deltagelse i et videnskabeligt forsøg

## **Effekten af seponering af hæmmere af renin-angiotensin systemet hos patienter med COVID-19**

Original titel: *Effects of discontinuing renin-angiotensin system inhibitors in patients with COVID-19*

**Dette videnskabelige forsøg henvender sig til patienter med sygdommen COVID-19, der tager én af to bestemte typer blodtryksænkende medicin. Vi vil undersøge om disse typer af blodtryksænkende medicin påvirker sygdomsforløbet med COVID-19.**

Vi vil spørge, om du vil deltage i et sundhedsvidenskabeligt forskningsprojekt, der udføres på Herlev-Gentofte Hospital under ledelse af overlæge og professor Filip Krag Knop.

På de næste sider beskriver vi, hvad forsøget går ud på, og hvordan det udføres. Det er naturligvis helt frivilligt at deltage i forsøget, og du kan trække dig ud undervejs – også selv om du har skrevet under på at ville deltage. Du behøver ikke begrunde, hvorfor du alligevel ikke ønsker at deltage, og det vil selvfølgelig ikke have betydning for din videre behandling.

Tag dig god tid til at læse denne information, før du beslutter dig. Hvis du beslutter dig for at deltage i forskningsprojektet, vil vi bede dig om at underskrive en samtykkeerklæring. Før du bestemmer dig for, om du vil deltage, vil du have mulighed for betænkningstid, og du har ret til at drøfte din deltagelse med en pårørende eller anden bisidder samt have vedkommende med pr. telefon eller videosamtale, når vi informerer dig nærmere om projektet.

RASCOVID-19

Version 2

19-04-2020

### Formål med forsøget

COVID-19 er en sygdom, der skyldes smitte med den nye coronavirus (som hedder SARS-Cov-2). Renin-angiotensin-systemet bliver i daglig tale kaldt RAS og er et vigtigt hormonsystem, som er med til at regulere blodtrykket. Hvis man har forhøjet blodtryk, kan to forskellige typer blodtryksænkende medicin påvirke RAS, hhv. *angiotensin converting enzyme*-hæmmere (ACE-hæmmere) og angiotensin II-receptorblokkere (ARB). ACE-hæmmere er medicin, der typisk slutter på ”-pril” fx enalapril. ARB er medicin, der typisk slutter på ”-tan” fx losartan. Din læge kan have udskrevet disse to typer medicin af andre grunde end for at behandle blodtrykket. Formålet med dette forsøg er at undersøge, hvordan behandling med ACE-hæmmere eller ARB og dermed en ændring af et af kroppens naturlige hormonsystemer (RAS) kan påvirke udviklingen af sygdommen COVID-19. I dette forsøg indgår derfor kun godkendte lægemidler i en mængde (dosis), som du allerede tager.

Coronavirus bruger et protein uden på kroppens celler til at komme ind i cellerne. Dette protein er en del af RAS og er bl.a. til stede uden på celler i lungerne. Det er én af grundene til, at coronavirus angriber lungerne. Virus skal ind i cellerne for at kunne gøre sin skadelige effekt, og proteinet har derfor en nøglerolle i kampen mod ny coronavirus.

De to typer af blodtryksænkende medicin (ACE-hæmmere og ARB) påvirker muligvis proteinet, men vi ved på nuværende tidspunkt ikke, om dette har en betydning på kroppens reaktion på COVID-19. Da det er to meget almindelige former for blodtryksænkende medicin, er det vigtigt at undersøge, hvordan det påvirker forløbet af COVID-19, så vi hurtigst muligt kan få etableret retningslinjer omkring brugen af disse hos patienter med COVID-19 – både i Danmark og i resten af verden. Det er det, vi gerne vil undersøge i dette forsøg.

Din deltagelse i forsøget omfatter din indlæggelse med COVID-19 og varer i alt 30 dage. Halvdelen af deltagerne skal fortsætte deres vanlige behandling med ACE-hæmmere eller ARB, men den anden halvdel skal holde pause i 30 dage. Vores hypotese er, at der ikke vil være en forskel i sygdomsforløbet mellem de to grupper, men dette er vigtigt at få bekræftet. Vi vil indhente oplysninger om dig fra din elektroniske journal i Sundhedsplatformen i 30 dage, fra du accepterer deltagelsen. Dette sker derfor mens, du er indlagt, men også efter din udskrivelse, hvis du er indlagt i færre end 30 dage.

### Forsøgets opbygning

Inden du kommer med i forsøget, vil vi gennemgå kravene for deltagelse med dig og sikre, at disse er opfyldt samt besvare de spørgsmål til denne deltagerinformationen, som du evt. måtte have.

Hvis du ønsker at deltage, vil vi læse information om dig (køn, alder, højde, vægt, aktuelle sygdomme), din aktuelle helbredssituation og dit forløb med COVID-19 i din elektroniske journal i Sundhedsplatformen.

Du finder en oversigt over forsøget på figur 1 på næste side. Når du deltager i forsøget, vil det den første dag blive tilfældigt bestemt, om du er blandt dem, der skal fortsætte eller stoppe med at tage den blodtryksænkende medicin, som påvirker RAS. Hvis du får flere typer blodtryksænkende medicin, vil du fortsat skulle tage den resterende medicin, og mens du er indlagt, vil dit blodtryk blive

RASCOVID-19

Version 2

19-04-2020

målt dagligt for at sikre, at det ikke bliver for højt eller for lavt. Den læge, der er ansvarlig for din behandling, vil være klar over, hvorvidt du fortsat tager medicinen eller ej, og hvis du er interesseret, vil du således også kunne få det at vide.

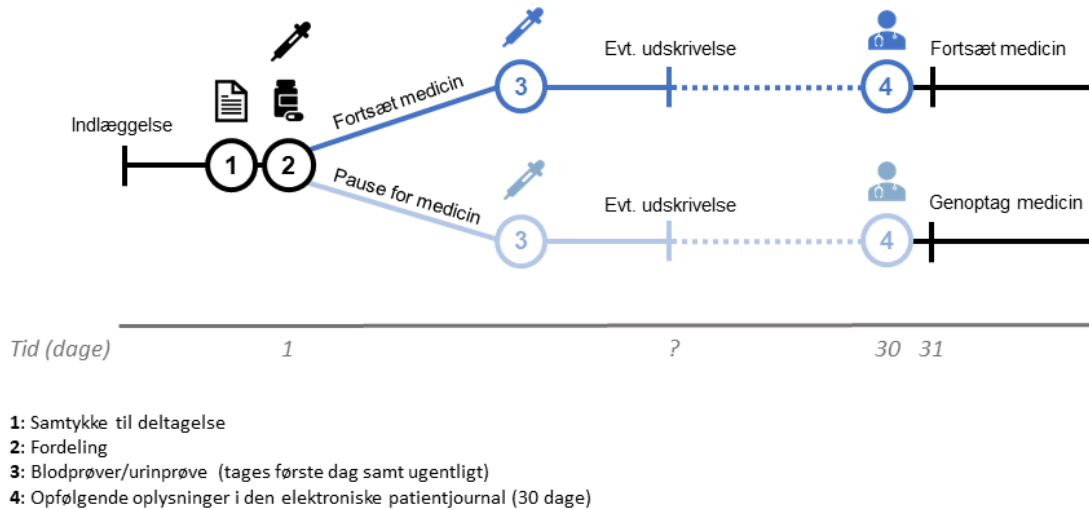

**Figur 1.** Oversigt over forsøget

I tillæg til de blodprøver som rutinemæssigt tages, mens du er indlagt, vil der blive taget enkelte blodprøver samt en urinprøve til undersøgelse af RAS den første dag, du er med i forsøget. Disse ekstra blodprøver og urinprøven vil herefter blive taget en gang om ugen, mens du er indlagt på hospitalet. Når du bliver udskrevet, tages disse prøver ikke længere.

30 dage efter din indtrædelse i dette forsøg, vil vi læse i din elektroniske journal i Sundhedsplatformen for at følge op på din helbredsmæssige situation.

Det vil ikke påvirke din øvrige behandling for COVID-19, at du deltager i dette forsøg.

Hvis du beslutter at være med i dette forsøg, vil vi bede om tilladelse til at kontakte dig et år efter din udskrivelse for at spørge ind til dit helbred på det tidspunkt. Dette er helt frivilligt, og er således ikke en del af aktuelle forsøg eller et krav for at deltage i forsøget. Selv om du nu siger ja til, at vi må kontakte dig om et år, har du stadig lov til at fortryde og sige nej til at deltage, når vi kontakter dig.

### Forsøgsdeltagere

Der skal indgå 215 hospitalsindlagte patienter med COVID-19 i forsøget. For at deltage skal du:

1. være diagnosticeret med COVID-19
2. være hospitalsindlagt
3. være i daglig behandling med blodtrykssænkende medicin: enten en ACE-hæmmer eller ARB
4. være 18 år eller derover
5. have underskrevet informeret samtykke

RASCOVID-19

Version 2

19-04-2020

For at deltage i forsøget må du ikke:

1. være diagnosticeret med systolisk hjertesvigt (hjertesvigt med nedsat uddrivningsfraktion)
2. have svær nyresygdom
3. have svært forhøjet blodtryk
4. have for lavt blodtryk
5. have et uregelmæssigt forbrug af RAS-hæmmende medicin
6. være i situationer hvor de RAS-hæmmende midler ikke bør anvendes (kontraindikationer) inkl. graviditet i andet eller tredje trimester, være ammende, have svært nedsat leverfunktion, overfølsomhed eller allergi over for lægemidlerne.

Når du giver dit samtykke til forsøget, giver du os samtidig tilladelse til at indhente information om alle ovenstående punkter. For at vurdere om du har et uregelmæssigt forbrug af blodtryks-sænkende medicin, vil vi stille dig nogle spørgsmål om dette (eller besvare samme spørgsmål på et spørgeskema) samt indhente informationer om dine recepter fra ”Det Fælles Medicinkort”.

### **Efter forsøget**

Hvis du fortsat er indlagt på hospitalet, når der er gået 30 dage, vil vi sørge for at informere dig om, at du fra dette tidspunkt af skal fortsætte eller genoptage din vanlige medicin.

Hvis du er udskrevet fra hospitalet, når der er gået 30 dage, og du har holdt pause med din medicin, ringer vi til dig for at minde dig om at genoptage din vanlige medicin derhjemme. Vi anbefaler, at du kontakter din egen læge for at få målt dit blodtryk i den forbindelse.

Hvis du har skulle fortsætte med din medicin under indlæggelsen, og er udskrevet fra hospitalet, før der er gået 30 dage, vil du få udleveret medicin fra os til de restende dage af forsøget. Vi ringer til dig efter 30 dage for at minde dig om, at du nu skal fortsætte med din egen medicin.

Efter din udskrivelse kan du altid kontakte os ved spørgsmål.

### **Bivirkninger, risici, komplikationer og ulemper**

Det er ukendt, hvorvidt det at stoppe med blodtryks-sænkende medicin er skadeligt eller gavnligt for forløbet af COVID-19, og det er således uvist, hvorvidt det vil have en effekt for dig at indgå i forsøget.

Dit blodtryk bliver normalt målt flere gange dagligt på hospitalet, og lægerne vil således tydeligt kunne følge med i, hvordan dit blodtryk udvikler sig og behandle dig på baggrund af dette, så du får den bedste behandling. Stopper du med at tage din blodtryks-sænkende medicin, vil dit blodtryk formentlig stige, og hvis du skulle få forhøjet blodtryk, kan lægen enten beslutte at give dig en anden type blodtryks-sænkende medicin eller genoptage din vanlige medicin. Hvis lægen vælger at give dig en ny type blodtryks-sænkende medicin, vil denne naturligvis kunne have bivirkninger. Det vil være lægens ansvar at informere dig om disse, før du begynder at tage medicinen, og de vil derfor ikke blive gennemgået her. Selvom lægen vælger at genoptage din vanlige behandling, vil du stadig kunne være med i forsøget. Din behandling vil altså til enhver tid være vigtigere end forsøget.

RASCOVID-19

Version 2

19-04-2020

Deltagelse i forsøget inkluderer ekstra blodprøvetagninger samt urinprøver. Én gang ved indtrædelse i forsøget og derefter en gang om ugen under hele din indlæggelse. Blodprøvetagning er forbundet med let ubehag. I sjældne tilfælde kan det ske, at der opstår overfladisk betændelse i den blodåre, blodprøven er taget fra. Tilstanden er ufarlig og går oftest over af sig selv. Der er minimal risiko for komplikationer ved denne tilstand, og svære tilfælde af infektion kan behandles med antibiotika eller antiinflammatorisk creme. Risikoen minimeres ved, at vi følger almindelige kliniske standarder. Der kan være risici ved forsøget, som vi endnu ikke kender. Vi beder dig derfor om at fortælle, hvis du oplever problemer med dit helbred, mens forsøget står på.

### **Behandling af personlige oplysninger herunder journaloplysninger**

Når du siger ja til at deltage i forsøget, omfatter samtykket adgang til dine personlige oplysninger fra din elektroniske journal i Sundhedsplatformen. Disse oplysninger bruges til at sikre at kriterierne for deltagelse i projektet er opfyldt. Vi vil desuden i løbet af forsøget indhente oplysninger om, hvordan dit COVID-19 sygdomsforløb udvikler sig, da det netop er dette, vi er interesseret i at undersøge. Derudover giver du os lov at se i Det Fælles Medicinkort, hvorvidt du regelmæssigt har fået udleveret medicin af typerne ACE-hæmmer eller ARB. Desuden indebærer dit samtykke, at vi får adgang til din elektroniske journal i Sundhedsplatformen, hvor vi vil indhente oplysninger om din helbredsstatus efter 30 dage. Vi vil også bede om tilladelse til at kontakte dig et år efter din udskrivelse for at undersøge din helbredsmæssige situation på det tidspunkt.

Når du indvilger i at deltage i forskningsprojektet, omfatter samtykket adgang til videregivelse og behandling af nødvendige oplysninger om dit helbred, øvrige private forhold og andre fortrolige oplysninger, som led i relevante myndigheders kontrol og tilsyn (f.eks. Lægemiddelstyrelsen). Derudover kan Lægemiddelstyrelsen, samt forsøgets sponsor, investigatorene og *good clinical practice* monitor få direkte adgang til at indhente oplysninger i patientjournalen herunder elektroniske journaler med henblik på kontrol og inspektion af forsøgets udførelse. Alle involverede parter har fuld tavshedspligt, og der er ingen oplysninger, der vil påvirke dine nuværende eller fremtidige rettigheder til behandling eller andre rettigheder i øvrigt. Forskningsprojektet er godkendt af Lægemiddelstyrelsen, Videnskabsetisk Komite og Videnscenter for Dataanmeldelse. Dine oplysninger bliver behandlet i overensstemmelse med databeskyttelsesloven og databeskyttelsesforordningen.

### **Biologisk materiale**

I forbindelse med forsøget udtages en urinprøve (6 ml) samt 30 ml blod ved starten af forsøget og derefter én gang hver uge, mens du er indlagt. Den samlede mængde vil således variere alt efter, hvor længe du er indlagt. Blodet opbevares forsvarligt på Center for Klinisk Metabolisk Forskning, Gentofte Hospital (som en forskningsbiobank) og vil blive analyseret for stoffer, som viser aktiviteten i RAS eller virussygdommen. Noget materiale opbevares også med henblik på eventuel gentagelse af analyser, hvis det bliver nødvendigt, og det resterende materiale bliver destrueret senest 31. marts 2028. Hver forsøgsdeltager tildeles et forsøgsnummer, og det er kun dette nummer, som vil stå på prøveglassene.

EudraCT-nummer: 2020-001544-26

5

RASCOVID-19

Version 2

19-04-2020

Du kan til hver en tid kontakte Center for Klinisk Metabolisk Forskning og få dit materiale destrueret uden begrundelse og uden at det vil påvirke dine fremtidige rettigheder. Forskningsbiobanken er godkendt af Videnskabsetisk Komité og Datastilsynet.

### Forsøgets nytte

Dette forsøg undersøger, om to meget almindelige former for blodtrykssænkende medicin (ACE-hæmmere og ARB) påvirker RAS og forløbet af COVID-19. Alene i Danmark er der flere hundredetusinde mennesker, der dagligt tager disse to typer medicin. COVID-19 er en alvorlig sygdom, og det er derfor vigtigt at undersøge om ACE-hæmmere og ARB påvirker forløbet af sygdommen. Forsøget vil således ikke direkte komme dig til gavn, men vil give os viden om disse vigtige problemstillinger, der kan hjælpe til hurtigst muligt at få etableret retningslinjer omkring brugen af disse i relation til sygdommen COVID-19 – både i Danmark og i resten af verden.

### Afbrydelse af forsøget

Forsøget afbrydes for dig:

- Hvis du ønsker at udgå
- Hvis resultaterne fra 108 deltagere (*statistisk midtvejsanalyse*), viser, at en af grupperne klarer sig væsentlig bedre end den anden
- Hvis ekstraordinære omstændigheder umuliggør fuldførelse af forsøget. Hvis der opstår ekstraordinære hændelser, der medfører at projektet ikke kan fuldføres helt eller delvist, vil forsøget blive afbrudt for alle igangværende forsøgsdeltagere og du informeres om årsagen.

### Vederlag

Der ydes ingen økonomisk kompensation for deltagelse i forsøget.

### Økonomi

Forsøgsansvarlig er professor, overlæge, ph.d. Filip Krag Knop. Initiativtagere til forsøget er en forskningsgruppe med stor erfaring med hormonsystemer, lægemidler og kliniske forsøg som ledes af professor, overlæge, ph.d. Filip Krag Knop.

Projektets driftsudgifter er dækket af Novo Nordisk Fonden med en samlet støtte på 3.335.000 kr. Støtten dækker udgifterne i forbindelse med forsøget herunder løn. Novo Nordisk Fonden vil ikke få indflydelse på forsøgsdesignet, og vil ikke få indflydelse på tolkning eller offentliggørelse af data. Fondsmidlerne er indsat på fondskonti under Center for Klinisk Metabolisk Forskning, Gentofte Hospital, som er under hospitalets revision. Hverken den forsøgsansvarlige eller andre i forskningsgruppen har økonomiske interesser i udførelsen eller resultaterne af projektet.

### Adgang til forsøgsresultater

Resultaterne af forsøget vil blive sammenskrevet til en eller flere artikler og vil blive offentliggjort hurtigst muligt, fagligt forsvarligt og i overensstemmelse med Databeskyttelsesloven. Såfremt du

RASCOVID-19

Version 2

19-04-2020

ønsker det, vil du blive skriftligt informeret om resultaterne efter forsøgets afslutning, dvs. efter at forsøg for alle inkluderede forsøgspersoner er afsluttet, og data er gjort op.

### **Forsøgspersoners generelle rettigheder og kontaktperson for forsøget**

Vi håber, at du med denne information har fået tilstrækkeligt indblik i, hvad det vil sige at deltage i forsøget, og at du føler dig rustet til at beslutte, om du vil deltage. Vi beder dig også læse det vedlagte materiale "Forsøgspersonens rettigheder i et sundhedsvidenskabeligt forskningsprojekt".

Hvis du vil vide mere om forsøget, er du meget velkommen til at kontakte os på Center for Klinisk Metabolisk Forskning, Gentofte Hospital:

Professor og overlæge Filip Krag Knop, ph.d.  
Gentofte Hospitalsvej 7, 2900 Hellerup  
Mailadresse: [filip.krag.knop.01@regionh.dk](mailto:filip.krag.knop.01@regionh.dk)  
Telefon: +45 3867 4266

Kontaktoplysninger til den ansvarlige læge på Herlev Hospital:

Hans Johan Niklas Lorentsson  
Borgmester Ib Juuls Vej 1, 2730 Herlev  
Mailadresse: FØLGER  
Telefon: FØLGER

Kontaktoplysninger til den ansvarlige læge på Gentofte Hospital:

Vivian Kliim-Hansen  
Gentofte Hospitalsvej 2, 2900 Hellerup  
Mailadresse: FØLGER  
Telefon: FØLGER

Med venlig hilsen

Filip Krag Knop  
Professor og overlæge, ph.d.  
Forsøgsansvarlig
